# Supplementary material for: Immune Cell Density Evaluation Improves the Prognostic Values of Staging and p16 in Oropharyngeal Cancer
Source: MDPI journal article supplement (doi:10.3390/cancers14225560), 2022-11-12
Supplement: s1 [file s1]

**Supplementary Table S1.** Description of immunostaining experimental conditions.

| Immunostaining       | CD8                                                        | FoxP3           | CD68                                                       | CD1a                                                       |
|----------------------|------------------------------------------------------------|-----------------|------------------------------------------------------------|------------------------------------------------------------|
| Antigen retrieval    |                                                            |                 |                                                            |                                                            |
| Buffers              | EDTA 10%                                                   | Citrate 10%     | EDTA 10%                                                   | EDTA 10%                                                   |
| Conditions           | *PC 6 min                                                  | *MW 21 min      | PC 6 min                                                   | PC 11 min                                                  |
| Blocking             | Casein 0.5% 15 min                                         | CSAII kit       | Casein 0.5% 15 min                                         | Casein 0.5% 1 h                                            |
| Primary antibodies   |                                                            |                 |                                                            |                                                            |
| Species              | Mouse                                                      | Mouse           | Mouse                                                      | Mouse                                                      |
| Source               | Dako                                                       | Invitrogen      | Dako                                                       | Dako                                                       |
| Dilution             | 1/200                                                      | 1/200           | 1/200                                                      | 1/20                                                       |
| Timing               | 1 h *RT                                                    | 1 h RT          | 1 h RT                                                     | Overnight 4°C                                              |
| Secondary antibodies |                                                            |                 |                                                            |                                                            |
| Kit                  | BrightVision<br>Poly- HRP-Anti<br>Mouse/Rabbit<br>IgG, VWR | CSAII kit, Dako | BrightVision<br>Poly- HRP-Anti<br>Mouse/Rabbit<br>IgG, VWR | BrightVision<br>Poly- HRP-Anti<br>Mouse/Rabbit<br>IgG, VWR |

\*PC = Pressure Cooker, MW = Micro-Waves, RT = Room Temperature
